# Supplementary material for: POTION: an end-to-end pipeline for positive Darwinian selection detection in genome-scale data through phylogenetic comparison of protein-coding genes
Source: PubMed Central journal article supplement (PMC4521464; doi:10.1186/s12864-015-1765-0), 2015-08-01
Supplement: 12864_2015_1765_MOESM8_ESM.pdf [file 12864_2015_1765_MOESM8_ESM.pdf]

## 1 - Number of sequences per group

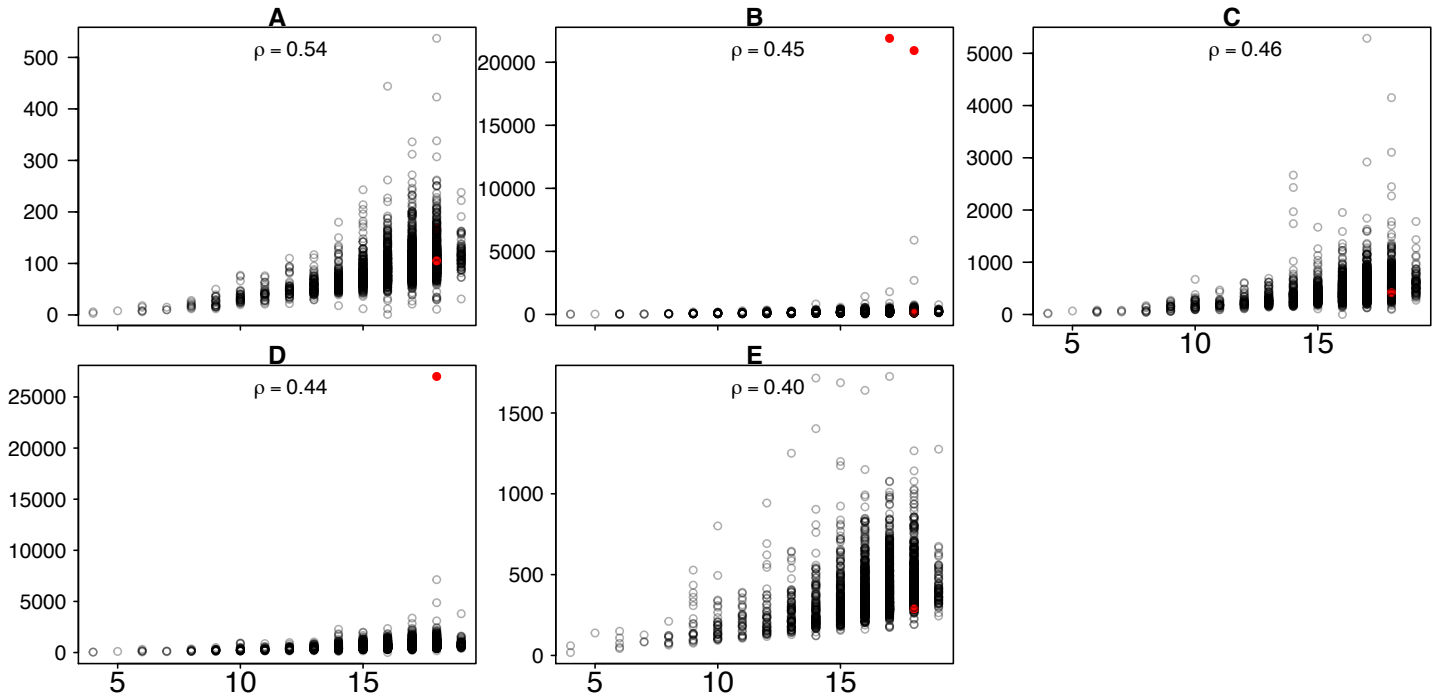

## 2 - Group alignment length

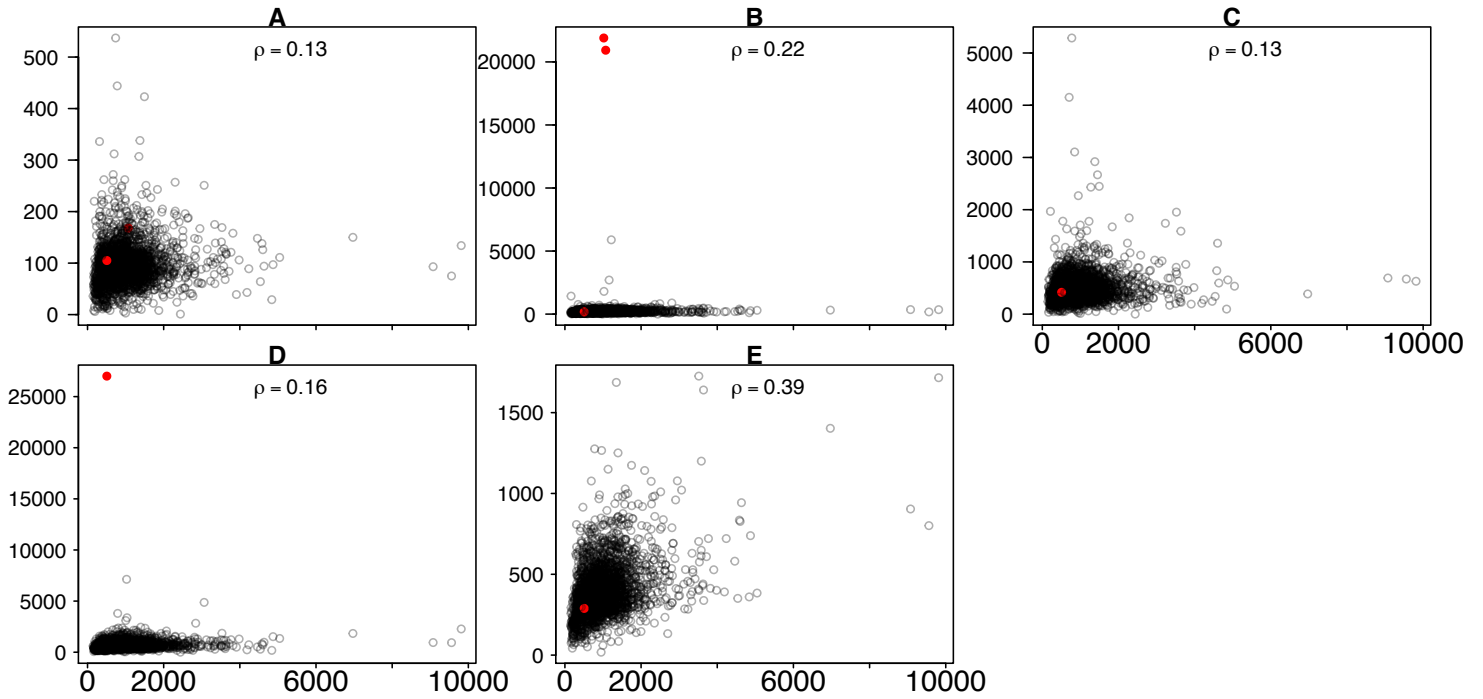

### 3 - Median group identity for pairwise alignments

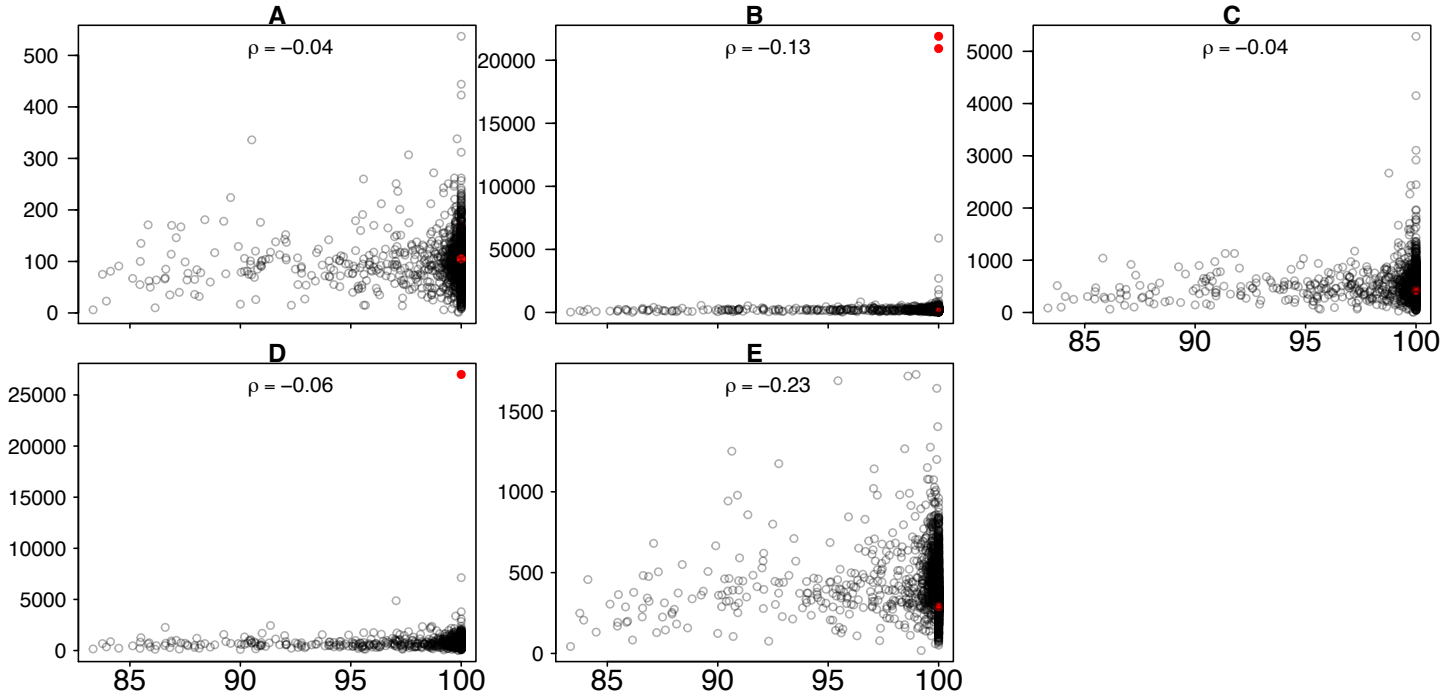

### 4 - Mean group identity for pairwise alignments

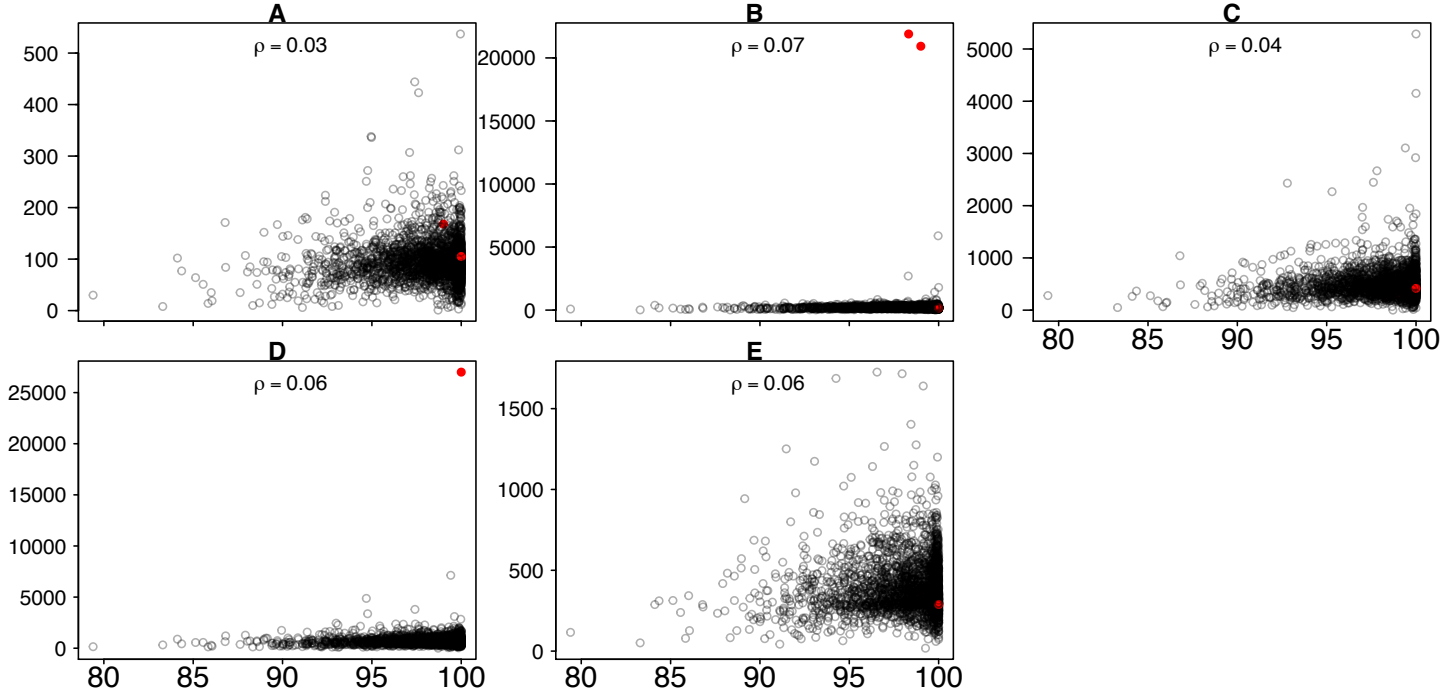

## 5 - Standard deviation of identities for pairwise alignments

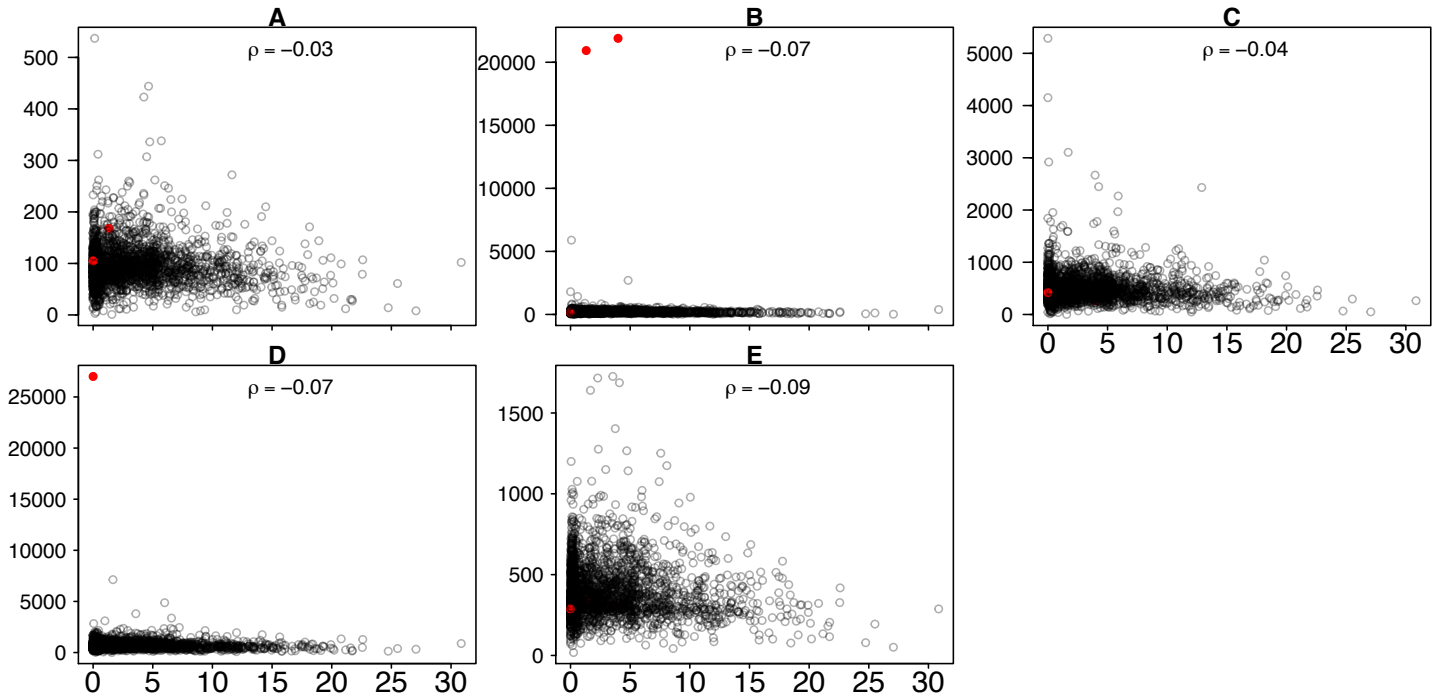

**Time to compute a task for a given group of homologous (y-axis) as a function of distinct group properties likely to influence computation time (x axis). A) M1a model; B) M2 model; C) M7 model; D) M8 model; E - phylogenetic tree. Numbers at the top of each graph represent Spearman's correlation coefficient. Time-consuming groups are highlighted in red.**
